# Supplementary material
Source: PubMed Central journal article supplement (PMC196597)
Supplement: plntphys_133_1_191__1.pdf [file plntphys_133_1_191__1.pdf]

**MIPS-code/GI    *petc-2* vs. WT    *atpd-1* vs. WT**  
***up-regulated in both mutants***

|           |      |       |
|-----------|------|-------|
| At4g29060 | 2.09 | 1.65  |
| At4g33170 | 1.28 | 4.55  |
| At4g35170 | 2.23 | 2.26  |
| At4g27990 | 3.55 | 2.13  |
| At2g39670 | 1.48 | 2.78  |
| At2g03220 | 1.29 | 1.57  |
| At4g38660 | 1.55 | 1.86  |
| At4g27510 | 1.62 | 7.93  |
| At2g23800 | 1.45 | 1.58  |
| At1g17740 | 1.40 | 6.26  |
| At4g23890 | 1.61 | 1.51  |
| At4g37890 | 1.66 | 7.24  |
| At5g23070 | 1.46 | 5.40  |
| At4g32040 | 1.32 | 1.67  |
| At5g61450 | 1.28 | 2.78  |
| At4g14910 | 1.31 | 3.48  |
| At4g00170 | 2.03 | 1.60  |
| At2g37330 | 1.58 | 2.08  |
| At4g19900 | 1.73 | 13.20 |
| At3g54900 | 1.45 | 1.61  |
| At3g63410 | 4.41 | 1.61  |
| At5g53920 | 1.52 | 13.39 |
| At3g04650 | 2.13 | 4.05  |
| At4g26860 | 1.39 | 2.54  |
| At4g19010 | 1.47 | 3.68  |
| At5g36860 | 1.95 | 10.44 |
| At5g04770 | 1.32 | 2.45  |
| At3g18190 | 1.51 | 2.71  |
| At1g35510 | 2.50 | 15.91 |
| At5g19850 | 1.31 | 4.64  |
| At2g28070 | 1.38 | 3.39  |
| At4g24840 | 1.31 | 2.56  |
| At3g57780 | 1.29 | 2.32  |
| At4g20360 | 1.42 | 1.53  |
| At2g37230 | 1.58 | 1.38  |
| At4g17070 | 2.25 | 8.18  |
| At2g41460 | 1.34 | 3.96  |
| At4g23190 | 1.43 | 1.72  |
| At4g13550 | 2.07 | 4.23  |
| At2g04240 | 2.32 | 3.28  |
| At1g73110 | 1.50 | 2.81  |
| At4g15910 | 1.65 | 3.35  |
| At1g73150 | 1.29 | 4.07  |
| At3g53350 | 1.74 | 2.29  |
| At5g66210 | 1.47 | 5.57  |
| At4g03410 | 1.57 | 1.78  |
| At5g56050 | 1.76 | 5.49  |
| At5g62840 | 1.41 | 3.28  |
| At5g41380 | 1.64 | 4.48  |
| At2g18820 | 1.64 | 5.02  |
| At5g45980 | 1.37 | 2.61  |
| At2g37750 | 1.67 | 1.68  |
| At3g48000 | 1.44 | 2.06  |
| At2g43870 | 2.60 | 2.43  |

|           |      |       |
|-----------|------|-------|
| At4g28840 | 1.42 | 2.78  |
| At4g03310 | 1.35 | 16.19 |
| At4g27250 | 1.31 | 7.04  |
| At2g01760 | 1.50 | 4.89  |
| At1g22680 | 3.27 | 2.33  |
| At5g06290 | 1.29 | 1.45  |
| At5g52810 | 2.03 | 2.94  |
| At4g39940 | 5.28 | 2.14  |
| At3g48320 | 1.84 | 2.78  |
| At5g52250 | 2.75 | 1.89  |
| At3g44570 | 2.27 | 2.57  |
| At3g01370 | 1.70 | 4.19  |
| At2g31040 | 1.89 | 1.71  |
| At1g02060 | 1.59 | 13.41 |
| At4g09620 | 2.81 | 4.08  |
| At3g03880 | 1.43 | 3.12  |
| At4g07990 | 2.86 | 10.24 |
| At2g35650 | 1.40 | 4.79  |
| At3g50770 | 1.41 | 4.72  |
| At1g72520 | 1.82 | 1.89  |
| At5g04600 | 2.68 | 1.36  |
| At4g17650 | 1.52 | 3.59  |
| At2g33980 | 1.81 | 6.08  |
| At1g44575 | 1.35 | 2.04  |
| At3g58990 | 1.29 | 1.77  |
| At3g58190 | 1.71 | 6.47  |
| At2g37040 | 1.86 | 5.33  |
| At2g38470 | 1.45 | 5.61  |
| At1g48490 | 1.67 | 1.95  |
| At1g05190 | 1.44 | 3.82  |
| At4g02740 | 1.35 | 3.96  |
| At1g05140 | 3.70 | 4.36  |
| At4g13260 | 1.39 | 3.95  |
| At1g79380 | 1.39 | 1.70  |
| At1g04570 | 1.47 | 2.83  |
| At5g13280 | 1.44 | 3.60  |
| At2g44570 | 1.30 | 1.85  |
| At1g30950 | 2.00 | 1.36  |
| At1g51350 | 1.53 | 5.25  |
| At3g27740 | 1.59 | 2.94  |
| At1g22040 | 1.41 | 3.58  |
| At1g20070 | 2.30 | 10.38 |
| At5g06670 | 1.71 | 1.79  |
| At1g78630 | 1.56 | 2.05  |
| At1g74220 | 2.00 | 2.70  |
| At2g37510 | 2.69 | 4.75  |
| At1g65370 | 1.33 | 4.44  |
| At4g08900 | 2.19 | 1.46  |
| At2g39360 | 1.71 | 2.97  |
| At1g05610 | 1.39 | 2.20  |
| At2g33250 | 1.95 | 2.38  |
| At4g08940 | 1.33 | 2.09  |
| At4g11090 | 3.98 | 1.95  |
| At5g04590 | 1.64 | 1.39  |
| At2g38310 | 3.51 | 1.53  |
| At2g21860 | 1.42 | 1.77  |

|           |      |       |
|-----------|------|-------|
| At3g21865 | 1.49 | 4.47  |
| At2g45310 | 1.31 | 2.12  |
| At4g25290 | 2.51 | 3.09  |
| At2g31800 | 1.33 | 1.38  |
| At4g25120 | 1.58 | 2.02  |
| At3g22690 | 1.60 | 2.13  |
| At2g17120 | 1.79 | 7.81  |
| At4g35510 | 1.38 | 2.30  |
| At3g57440 | 3.05 | 7.61  |
| At4g00650 | 1.43 | 3.51  |
| At3g26940 | 1.42 | 1.67  |
| At5g66530 | 2.06 | 2.02  |
| At3g49350 | 1.48 | 16.29 |
| At4g08600 | 1.52 | 8.34  |
| At1g01290 | 1.57 | 5.61  |
| At2g17540 | 4.14 | 4.28  |
| At2g26790 | 1.32 | 2.70  |
| At3g02875 | 1.29 | 2.47  |
| At2g32920 | 1.44 | 2.97  |
| At4g25050 | 1.38 | 1.99  |
| At4g29890 | 2.07 | 4.93  |
| At2g23230 | 1.71 | 2.61  |
| At4g26780 | 2.15 | 12.47 |
| At2g22890 | 2.60 | 2.95  |
| At3g21810 | 1.68 | 3.17  |
| At1g20510 | 1.48 | 4.69  |
| At3g07100 | 2.85 | 1.64  |
| At2g41040 | 2.47 | 3.79  |
| At1g65080 | 1.53 | 5.53  |
| At3g63190 | 1.54 | 1.75  |
| At3g02040 | 1.86 | 5.89  |
| At1g24040 | 1.71 | 2.00  |
| At5g19000 | 1.37 | 3.58  |
| At4g17330 | 1.44 | 5.64  |
| At3g22700 | 1.54 | 4.30  |
| At5g02860 | 1.51 | 3.51  |
| At5g49910 | 1.43 | 1.46  |
| At4g27020 | 3.80 | 23.44 |
| At2g42870 | 1.93 | 1.48  |
| At4g11170 | 1.62 | 2.85  |
| At5g23120 | 1.37 | 1.56  |
| At5g61440 | 1.31 | 5.34  |
| At4g27670 | 1.30 | 2.12  |
| At2g35600 | 1.90 | 3.68  |
| At3g57110 | 1.32 | 1.44  |
| At4g22760 | 1.37 | 3.18  |
| At4g32130 | 2.57 | 1.88  |
| At4g04350 | 1.30 | 5.27  |
| At4g32060 | 2.08 | 10.16 |
| At1g24150 | 1.32 | 1.78  |
| At2g35400 | 1.41 | 2.16  |
| At3g26630 | 3.39 | 1.46  |
| At4g33350 | 1.99 | 2.10  |
| At1g78160 | 1.45 | 6.03  |
| At3g23940 | 2.14 | 3.16  |
| At3g10350 | 2.20 | 6.30  |

|           |      |       |
|-----------|------|-------|
| At5g44820 | 1.51 | 2.77  |
| At3g01170 | 1.37 | 2.10  |
| At1g32900 | 2.04 | 1.77  |
| At1g66670 | 1.72 | 5.55  |
| At4g20090 | 2.46 | 3.32  |
| At5g32490 | 1.73 | 1.49  |
| At5g65840 | 1.87 | 6.74  |
| At4g27580 | 1.36 | 4.07  |
| At4g34440 | 1.34 | 1.41  |
| At1g23210 | 1.32 | 11.41 |
| At4g22320 | 2.32 | 4.03  |
| At1g64780 | 1.47 | 5.64  |
| At5g07540 | 2.07 | 5.59  |
| At1g69370 | 1.44 | 1.83  |
| At2g43050 | 1.29 | 1.98  |
| At1g13990 | 1.36 | 1.35  |
| At4g18370 | 1.30 | 1.35  |
| At5g58330 | 1.33 | 8.17  |
| At1g12900 | 2.29 | 2.43  |
| At2g19940 | 1.53 | 1.64  |
| At4g24280 | 1.36 | 2.27  |
| At3g15780 | 1.42 | 4.01  |
| At1g01730 | 1.79 | 1.90  |
| At4g39540 | 1.66 | 3.07  |
| At2g19870 | 1.42 | 16.07 |
| At4g39980 | 1.36 | 5.87  |
| At3g58610 | 1.54 | 2.30  |
| At4g39030 | 1.40 | 7.29  |
| At4g29540 | 1.49 | 4.05  |
| At2g11380 | 1.55 | 5.10  |
| At1g34300 | 1.44 | 4.44  |
| At4g21210 | 1.33 | 1.45  |
| At4g29670 | 2.83 | 12.87 |
| At2g31160 | 1.38 | 2.01  |
| At4g29750 | 1.31 | 2.13  |
| At2g47860 | 1.37 | 1.72  |
| At2g47910 | 1.37 | 3.02  |
| At1g52220 | 1.36 | 2.35  |
| At5g03940 | 1.56 | 1.47  |
| At4g34830 | 1.62 | 2.75  |
| At4g34200 | 1.51 | 2.17  |
| At4g10060 | 1.47 | 5.09  |
| At5g10980 | 1.31 | 1.43  |
| At5g48990 | 1.53 | 2.28  |
| At1g06730 | 1.34 | 1.45  |
| At1g18890 | 1.49 | 1.95  |
| At4g38970 | 2.01 | 2.41  |
| At3g63320 | 1.66 | 1.43  |
| At1g01500 | 2.19 | 1.51  |
| At1g79460 | 1.35 | 1.85  |
| At4g25970 | 1.38 | 1.98  |
| At5g26030 | 2.15 | 4.15  |
| At2g43100 | 1.36 | 2.68  |
| At2g11100 | 1.29 | 6.77  |
| At5g51460 | 1.80 | 1.67  |
| At1g54710 | 1.54 | 2.46  |

|           |      |       |
|-----------|------|-------|
| At3g47650 | 1.45 | 11.81 |
| At4g31530 | 2.32 | 5.66  |
| At5g04140 | 1.85 | 4.04  |
| At2g02740 | 1.55 | 1.68  |
| At4g30910 | 1.34 | 4.11  |
| At4g36150 | 1.31 | 3.82  |
| At4g20740 | 1.33 | 4.87  |
| At2g01480 | 1.88 | 1.69  |
| At4g08280 | 1.30 | 2.27  |
| At4g20930 | 2.61 | 7.57  |
| At2g16460 | 3.15 | 3.06  |
| At4g20690 | 1.89 | 1.39  |
| At5g17280 | 1.35 | 2.30  |
| At4g29790 | 1.41 | 1.96  |
| At1g80480 | 1.63 | 1.61  |
| At5g14840 | 1.86 | 2.68  |
| At3g42100 | 1.36 | 2.08  |
| At4g36190 | 1.77 | 1.97  |
| At2g04790 | 1.67 | 7.75  |
| At5g38680 | 1.57 | 1.80  |
| At5g38190 | 1.88 | 5.83  |
| At1g07160 | 3.62 | 1.70  |
| At4g18810 | 1.34 | 1.89  |
| At2g33230 | 2.86 | 1.62  |
| At4g26220 | 1.36 | 5.12  |
| At1g62180 | 1.41 | 5.71  |
| At2g01150 | 1.39 | 1.49  |
| At3g09600 | 1.55 | 1.38  |
| At2g33100 | 2.18 | 3.75  |
| At4g26310 | 1.66 | 2.74  |
| At4g20120 | 1.34 | 1.45  |
| At4g01650 | 2.94 | 2.33  |
| At3g44670 | 1.34 | 2.66  |
| 3834303   | 1.81 | 1.54  |
| At1g21670 | 1.35 | 13.27 |
| At3g44880 | 1.37 | 12.79 |
| At2g18900 | 1.78 | 1.36  |
| At2g15820 | 2.21 | 5.58  |
| At2g18940 | 1.29 | 1.53  |
| At2g24820 | 1.38 | 2.76  |
| At1g03260 | 1.70 | 2.09  |
| At2g22230 | 1.46 | 3.13  |
| At2g30570 | 1.42 | 2.77  |
| At1g75690 | 1.39 | 3.38  |
| At2g27360 | 1.30 | 3.93  |
| At2g18980 | 1.61 | 1.36  |
| At1g03230 | 1.41 | 1.60  |
| At2g30460 | 2.99 | 21.31 |
| At2g27290 | 1.28 | 4.04  |
| At1g50770 | 2.38 | 4.18  |
| At3g59100 | 1.49 | 1.85  |
| At3g63130 | 1.30 | 2.58  |
| At5g02250 | 1.76 | 1.60  |
| At5g13090 | 1.33 | 2.02  |
| At1g16880 | 1.28 | 1.42  |
| At5g06990 | 3.72 | 1.75  |

|           |      |       |
|-----------|------|-------|
| At2g04030 | 1.52 | 7.87  |
| At2g22210 | 1.31 | 2.54  |
| At5g49590 | 1.40 | 24.60 |
| At4g09700 | 1.70 | 1.65  |
| At4g24930 | 1.49 | 2.61  |
| At4g28590 | 1.66 | 2.39  |
| At4g31180 | 1.35 | 1.45  |
| At4g20230 | 3.34 | 2.07  |
| At4g12390 | 2.30 | 14.97 |
| At1g21600 | 1.80 | 4.02  |
| At1g10960 | 2.55 | 1.40  |
| At4g23200 | 1.29 | 1.42  |
| At5g35360 | 1.44 | 4.82  |
| At1g08770 | 1.60 | 2.08  |
| At2g05590 | 2.49 | 1.68  |
| At1g62250 | 1.40 | 1.46  |
| At5g39210 | 1.49 | 3.22  |
| At1g11470 | 1.47 | 3.86  |
| At4g22590 | 1.70 | 9.76  |
| At1g09780 | 1.45 | 1.63  |
| At3g07670 | 1.68 | 1.80  |
| At3g56410 | 1.31 | 2.68  |
| At3g52190 | 1.49 | 2.82  |
| At1g47520 | 1.52 | 6.54  |
| At3g26840 | 1.35 | 2.27  |
| At3g03580 | 1.43 | 3.33  |
| At5g22830 | 1.35 | 1.42  |
| At5g04360 | 1.57 | 1.37  |
| At3g63340 | 1.32 | 1.37  |
| At3g22780 | 1.62 | 4.21  |
| At5g46580 | 1.37 | 2.80  |
| At5g57930 | 1.51 | 3.90  |
| At3g24260 | 1.51 | 2.68  |
| At3g22430 | 1.30 | 2.96  |
| At2g21230 | 1.46 | 1.59  |
| At2g38340 | 1.35 | 1.35  |
| At4g36010 | 1.74 | 6.20  |
| At2g42310 | 1.52 | 1.55  |
| At3g44310 | 1.44 | 1.63  |
| At5g28750 | 1.41 | 2.41  |
| At1g49970 | 1.38 | 6.08  |
| At2g28880 | 1.34 | 1.82  |
| At3g54870 | 2.25 | 1.36  |
| At1g55630 | 1.31 | 3.40  |
| At4g01280 | 2.25 | 1.89  |
| At4g34730 | 1.78 | 2.02  |
| At3g47100 | 2.41 | 3.45  |
| At4g21460 | 1.78 | 2.01  |
| At1g59940 | 1.68 | 6.58  |
| At1g05385 | 1.32 | 1.42  |
| At3g56710 | 1.38 | 1.54  |
| At3g05710 | 1.38 | 5.74  |
| At2g48130 | 1.38 | 1.76  |
| At1g15850 | 1.43 | 4.23  |
| At4g39690 | 5.45 | 1.60  |
| At1g19050 | 1.59 | 1.51  |

|           |      |       |
|-----------|------|-------|
| At4g31870 | 1.55 | 4.27  |
| At5g49450 | 1.36 | 2.77  |
| At3g30780 | 1.52 | 1.85  |
| At5g61950 | 4.79 | 3.09  |
| At4g23450 | 1.39 | 2.86  |
| At5g64940 | 1.54 | 2.78  |
| At1g27540 | 1.37 | 2.44  |
| At1g67810 | 1.39 | 4.51  |
| At1g27380 | 1.28 | 7.05  |
| At5g52530 | 2.85 | 2.29  |
| At1g73650 | 1.70 | 1.99  |
| At1g65070 | 1.30 | 3.13  |
| At1g06280 | 2.80 | 3.49  |
| At5g58560 | 1.32 | 2.68  |
| At2g26280 | 1.48 | 1.50  |
| At3g56910 | 1.94 | 1.59  |
| At5g42070 | 1.34 | 6.92  |
| At4g13430 | 2.04 | 1.77  |
| At5g17710 | 1.49 | 2.04  |
| cob       | 1.43 | 3.21  |
| At4g37200 | 1.41 | 2.69  |
| At5g24120 | 1.36 | 1.60  |
| At1g54120 | 1.77 | 2.21  |
| At4g11980 | 1.49 | 17.22 |
| At4g14210 | 2.30 | 3.54  |
| At1g68690 | 1.48 | 2.32  |
| At1g27210 | 4.79 | 3.81  |
| At4g12770 | 1.55 | 1.67  |
| At3g58010 | 1.41 | 2.19  |
| At5g30460 | 1.31 | 1.71  |
| At5g54430 | 1.71 | 2.01  |
| At3g08720 | 2.33 | 7.17  |
| At1g03060 | 1.69 | 2.57  |
| At5g49020 | 2.04 | 3.16  |
| At3g60000 | 2.35 | 1.94  |
| At1g47730 | 1.51 | 2.88  |
| At3g23400 | 1.51 | 1.86  |
| At5g19220 | 1.78 | 3.55  |
| At3g14900 | 1.72 | 7.63  |
| At1g24130 | 1.29 | 3.08  |
| At1g70180 | 1.55 | 1.41  |
| At2g34470 | 1.81 | 2.61  |
| At4g37270 | 1.39 | 3.02  |
| At2g13150 | 2.48 | 3.09  |
| At2g34540 | 1.38 | 1.37  |

***down-regulated in both mutants***

|           |      |      |
|-----------|------|------|
| At5g54190 | 0.67 | 0.46 |
| At4g23930 | 0.68 | 0.69 |
| At3g50820 | 0.70 | 0.49 |
| At1g70350 | 0.74 | 0.50 |
| At1g12090 | 0.33 | 0.39 |
| At3g15360 | 0.54 | 0.55 |
| At1g80600 | 0.72 | 0.47 |
| At3g22970 | 0.63 | 0.65 |
| At2g37220 | 0.72 | 0.66 |

|           |      |      |
|-----------|------|------|
| At5g23440 | 0.49 | 0.52 |
| At4g17460 | 0.73 | 0.63 |
| At2g42540 | 0.25 | 0.27 |
| At4g19710 | 0.75 | 0.65 |
| At1g74960 | 0.71 | 0.54 |
| At5g66570 | 0.59 | 0.17 |
| At5g54270 | 0.65 | 0.52 |
| At4g03520 | 0.56 | 0.60 |
| At2g28900 | 0.42 | 0.40 |
| At4g09650 | 0.54 | 0.45 |
| At4g12520 | 0.65 | 0.72 |
| At3g05880 | 0.23 | 0.17 |
| At1g02730 | 0.15 | 0.63 |
| At3g43700 | 0.54 | 0.56 |
| At1g61520 | 0.60 | 0.51 |
| At1g51400 | 0.53 | 0.14 |
| At3g12120 | 0.68 | 0.40 |
| At2g20020 | 0.71 | 0.62 |
| At2g06030 | 0.14 | 0.58 |
| At3g62030 | 0.69 | 0.59 |
| At3g53460 | 0.78 | 0.55 |
| At2g39270 | 0.57 | 0.51 |
| At1g02560 | 0.70 | 0.39 |
| At2g45180 | 0.64 | 0.54 |
| At4g30620 | 0.75 | 0.40 |
| At5g05590 | 0.68 | 0.38 |
| At1g77490 | 0.44 | 0.44 |
| At3g21055 | 0.72 | 0.16 |
| At5g44680 | 0.61 | 0.53 |
| 3695380   | 0.75 | 0.74 |
| At3g26740 | 0.54 | 0.24 |
| At2g34420 | 0.77 | 0.32 |
| At5g62000 | 0.76 | 0.49 |
| At5g11480 | 0.75 | 0.36 |
| At1g48860 | 0.59 | 0.53 |
| At1g75380 | 0.66 | 0.61 |
| At1g20340 | 0.77 | 0.63 |
| At2g24090 | 0.58 | 0.47 |
| At4g16780 | 0.58 | 0.45 |
| At1g80130 | 0.36 | 0.63 |
| At5g19140 | 0.38 | 0.49 |
| At3g47470 | 0.72 | 0.40 |
| At1g32060 | 0.39 | 0.42 |
| At2g24020 | 0.70 | 0.72 |
| At2g04700 | 0.61 | 0.42 |
| At2g21660 | 0.34 | 0.32 |
| At2g25320 | 0.67 | 0.63 |
| At2g42530 | 0.14 | 0.21 |
| At2g15890 | 0.25 | 0.27 |
| At5g43930 | 0.48 | 0.55 |
| At3g60490 | 0.59 | 0.70 |
| At4g05180 | 0.55 | 0.21 |
| At2g36410 | 0.58 | 0.30 |
| At5g11550 | 0.61 | 0.65 |
| At1g03970 | 0.78 | 0.63 |
| At4g21280 | 0.71 | 0.36 |



|           |      |      |
|-----------|------|------|
| At4g32340 | 0.77 | 0.54 |
| At4g28750 | 0.59 | 0.53 |
| At2g20260 | 0.60 | 0.68 |
| At3g66654 | 0.61 | 0.52 |
| At3g08760 | 0.59 | 0.73 |
| At1g79040 | 0.52 | 0.42 |
| At1g55670 | 0.60 | 0.26 |

***up/down***

|           |      |      |
|-----------|------|------|
| At5g13630 | 2.34 | 0.66 |
| At2g25080 | 1.46 | 0.52 |
| At2g34640 | 2.03 | 0.52 |
| At4g14690 | 1.30 | 0.36 |
| At1g08380 | 1.51 | 0.58 |
| At1g25220 | 1.28 | 0.56 |
| At1g55490 | 1.46 | 0.57 |
| At2g14750 | 1.35 | 0.40 |
| At4g02520 | 1.54 | 0.71 |
| At2g05100 | 1.90 | 0.30 |
| At2g05070 | 2.21 | 0.27 |
| At3g27690 | 1.75 | 0.68 |
| At4g24770 | 1.80 | 0.67 |
| At1g48880 | 3.06 | 0.29 |
| rpoC1     | 1.45 | 0.50 |
| At4g12500 | 1.87 | 0.69 |
| At4g03920 | 1.44 | 0.67 |
| At1g58290 | 1.67 | 0.59 |
| At4g08870 | 2.59 | 0.60 |
| At4g34350 | 2.95 | 0.42 |
| At5g52440 | 1.75 | 0.47 |
| At3g48850 | 1.39 | 0.46 |
| At4g32020 | 1.43 | 0.55 |
| At4g33780 | 1.87 | 0.71 |
| At2g47730 | 1.53 | 0.45 |
| At5g14320 | 1.34 | 0.58 |
| 3695393   | 2.41 | 0.58 |
| At2g35240 | 1.32 | 0.58 |
| At1g17420 | 2.19 | 0.69 |
| At4g10810 | 1.85 | 0.67 |
| At2g43090 | 1.38 | 0.46 |
| At2g14890 | 1.37 | 0.28 |
| At1g54520 | 1.35 | 0.74 |
| At1g06680 | 1.37 | 0.56 |
| At4g01800 | 1.29 | 0.65 |
| At1g79050 | 2.84 | 0.57 |
| At1g54580 | 1.32 | 0.68 |
| At1g54630 | 2.00 | 0.62 |
| rbcL      | 1.30 | 0.27 |
| At2g40000 | 1.46 | 0.66 |
| At2g28760 | 1.96 | 0.60 |
| At2g44030 | 2.65 | 0.62 |
| At5g50280 | 1.47 | 0.59 |
| At3g18110 | 1.55 | 0.56 |
| At4g01050 | 2.29 | 0.71 |
| At2g39000 | 1.37 | 0.70 |
| At4g05070 | 1.70 | 0.51 |

|           |      |      |
|-----------|------|------|
| At1g05860 | 1.76 | 0.38 |
| At5g23010 | 1.37 | 0.34 |

**down/up**

|           |      |      |
|-----------|------|------|
| At4g38460 | 0.69 | 1.91 |
| At2g17265 | 0.75 | 7.56 |
| At1g77250 | 0.78 | 3.26 |
| At1g09420 | 0.54 | 8.94 |
| At2g03200 | 0.73 | 2.02 |
| At4g37470 | 0.72 | 2.00 |
| At5g02850 | 0.67 | 2.60 |
| At1g27610 | 0.78 | 2.48 |
| At4g16490 | 0.61 | 2.66 |
| At1g67440 | 0.77 | 1.41 |
| At2g31350 | 0.47 | 2.77 |
| At4g14930 | 0.46 | 1.77 |
| At4g16590 | 0.70 | 2.16 |
| At2g30880 | 0.62 | 1.62 |
| At1g12520 | 0.77 | 1.50 |
| At3g57950 | 0.77 | 1.71 |
| At1g29070 | 0.67 | 2.54 |
| At2g24730 | 0.38 | 4.88 |
| At4g16820 | 0.56 | 3.28 |
| At4g12620 | 0.65 | 8.03 |
| At4g15870 | 0.55 | 1.67 |
| At5g07760 | 0.71 | 2.67 |
| At4g14620 | 0.72 | 1.46 |
| At5g51670 | 0.63 | 2.12 |
| At3g55070 | 0.52 | 1.60 |
| At3g18870 | 0.75 | 3.27 |
| At5g14040 | 0.78 | 3.58 |
| At5g48370 | 0.76 | 6.05 |
| At4g16080 | 0.55 | 1.38 |
| At5g11930 | 0.76 | 2.48 |
| At5g15530 | 0.76 | 2.49 |
| At5g61200 | 0.75 | 1.94 |
| At3g56700 | 0.59 | 2.00 |
| At1g48620 | 0.69 | 3.04 |
| At1g79360 | 0.64 | 2.45 |
| At1g80450 | 0.46 | 1.80 |
| At2g44040 | 0.71 | 2.75 |
| At3g52150 | 0.68 | 1.49 |
| At1g74850 | 0.71 | 2.35 |
| At2g41950 | 0.77 | 4.03 |
| At1g79960 | 0.77 | 2.19 |
| At4g34590 | 0.68 | 1.58 |
| At4g17740 | 0.50 | 1.94 |
| At4g26900 | 0.57 | 3.29 |
| At2g17300 | 0.50 | 1.69 |
| At1g03810 | 0.58 | 3.53 |
| At2g33430 | 0.69 | 1.85 |
| At2g17420 | 0.31 | 1.46 |
| At5g57990 | 0.46 | 1.57 |
| At3g09490 | 0.56 | 1.95 |
| At5g19900 | 0.45 | 1.41 |
| At2g19240 | 0.38 | 5.11 |

|           |      |       |
|-----------|------|-------|
| At3g16000 | 0.65 | 2.43  |
| At1g15410 | 0.53 | 2.16  |
| At5g02750 | 0.42 | 3.78  |
| At5g12150 | 0.70 | 2.45  |
| At4g18540 | 0.75 | 3.65  |
| At3g56010 | 0.71 | 3.58  |
| At5g50640 | 0.60 | 1.71  |
| At3g42490 | 0.34 | 9.82  |
| At3g24190 | 0.76 | 2.13  |
| At4g04730 | 0.75 | 1.42  |
| At4g03150 | 0.32 | 14.56 |
| At4g27230 | 0.74 | 1.61  |
| At3g09050 | 0.49 | 1.81  |
| At5g15700 | 0.36 | 4.34  |
| At5g55210 | 0.73 | 7.17  |
| At3g03710 | 0.77 | 3.63  |
| At3g11490 | 0.58 | 2.62  |
| At3g05020 | 0.71 | 1.40  |
| At3g03630 | 0.71 | 2.68  |
| At1g73250 | 0.74 | 1.60  |
| At2g01610 | 0.73 | 2.19  |
| At3g11150 | 0.76 | 2.18  |
| At1g33250 | 0.42 | 1.39  |
| At3g57280 | 0.40 | 1.37  |
| At1g27660 | 0.67 | 2.50  |
| At5g65490 | 0.74 | 9.33  |
| At3g17550 | 0.56 | 3.88  |
| At1g60000 | 0.77 | 1.96  |
| At2g48090 | 0.74 | 6.40  |
| At5g26570 | 0.29 | 2.18  |
| At3g01550 | 0.76 | 3.74  |
| At3g44720 | 0.73 | 2.61  |
| At1g79840 | 0.57 | 4.37  |
| At2g30320 | 0.73 | 1.74  |
| At2g05180 | 0.73 | 1.59  |
| At4g08630 | 0.69 | 2.21  |
| At1g80670 | 0.73 | 1.84  |
| At2g13810 | 0.67 | 6.50  |
| At2g07710 | 0.67 | 1.52  |
| At1g75390 | 0.66 | 2.58  |
| At4g23140 | 0.65 | 2.17  |
| At5g18260 | 0.78 | 7.72  |
| At5g10910 | 0.72 | 5.48  |
| At3g20970 | 0.58 | 1.80  |
| At2g34020 | 0.61 | 5.70  |
| At1g30700 | 0.43 | 4.74  |
| At4g07960 | 0.46 | 9.59  |
| At4g22920 | 0.75 | 12.33 |
| At2g37090 | 0.52 | 2.86  |
| At2g15470 | 0.57 | 2.47  |
| At2g37080 | 0.63 | 1.47  |
| At2g31720 | 0.75 | 3.85  |
| At2g34370 | 0.71 | 1.92  |
| At2g44550 | 0.54 | 2.09  |
| At2g40980 | 0.63 | 1.96  |
| At1g60550 | 0.78 | 1.38  |

|           |      |       |
|-----------|------|-------|
| At2g44560 | 0.67 | 1.39  |
| At2g15740 | 0.72 | 2.77  |
| At3g06860 | 0.70 | 1.57  |
| At1g01520 | 0.77 | 5.57  |
| At1g61980 | 0.65 | 3.52  |
| At1g11820 | 0.65 | 2.18  |
| At3g22160 | 0.76 | 3.25  |
| At1g62010 | 0.65 | 1.80  |
| At3g09070 | 0.70 | 3.17  |
| At3g06590 | 0.50 | 2.53  |
| At4g04770 | 0.66 | 1.96  |
| At5g25900 | 0.72 | 3.89  |
| At1g01550 | 0.73 | 5.29  |
| At1g30100 | 0.72 | 1.50  |
| At1g70990 | 0.74 | 5.21  |
| At1g30120 | 0.39 | 3.25  |
| At4g37000 | 0.74 | 7.74  |
| At2g28450 | 0.71 | 2.05  |
| At3g52490 | 0.73 | 2.85  |
| At2g43430 | 0.62 | 3.09  |
| At2g46590 | 0.70 | 2.94  |
| At1g18680 | 0.40 | 3.11  |
| At3g06850 | 0.58 | 5.40  |
| At5g18910 | 0.64 | 6.85  |
| At5g59610 | 0.43 | 5.52  |
| At3g54320 | 0.56 | 1.50  |
| At2g31170 | 0.70 | 4.50  |
| At1g32760 | 0.71 | 5.23  |
| At1g12980 | 0.54 | 3.64  |
| At2g38450 | 0.69 | 4.32  |
| At3g52550 | 0.77 | 2.37  |
| At2g26840 | 0.57 | 2.94  |
| At4g24860 | 0.66 | 2.45  |
| At4g24860 | 0.59 | 2.45  |
| At2g37880 | 0.71 | 4.98  |
| At4g24860 | 0.66 | 1.40  |
| At4g24860 | 0.59 | 1.40  |
| At1g50960 | 0.75 | 14.39 |
| At2g23330 | 0.75 | 4.31  |
| At2g30020 | 0.60 | 1.82  |
| At2g32840 | 0.78 | 2.39  |
| At2g26900 | 0.69 | 3.01  |
| At4g24910 | 0.78 | 3.67  |
| At5g56760 | 0.74 | 2.57  |
| At4g29920 | 0.66 | 1.90  |
| At4g34310 | 0.34 | 2.66  |
| At5g44750 | 0.70 | 2.09  |
| At3g48110 | 0.37 | 7.11  |
| At2g44940 | 0.40 | 5.12  |
| At2g39710 | 0.77 | 6.24  |
| At5g07900 | 0.58 | 5.78  |
| At1g19870 | 0.60 | 8.62  |
| At1g21060 | 0.76 | 1.90  |
| At1g51560 | 0.42 | 1.90  |
| At4g19100 | 0.50 | 4.02  |
| At4g30210 | 0.77 | 2.41  |

|           |      |       |
|-----------|------|-------|
| At4g33520 | 0.31 | 1.69  |
| At3g25110 | 0.75 | 1.84  |
| At1g44350 | 0.69 | 2.12  |
| At4g39970 | 0.73 | 2.70  |
| At2g29630 | 0.75 | 3.52  |
| At2g29670 | 0.58 | 1.81  |
| At5g03910 | 0.47 | 2.62  |
| At3g18420 | 0.48 | 2.93  |
| At2g33720 | 0.78 | 2.44  |
| At4g37380 | 0.28 | 2.97  |
| At1g08050 | 0.61 | 2.99  |
| At1g30320 | 0.56 | 2.25  |
| At4g10750 | 0.62 | 4.05  |
| At1g52500 | 0.62 | 2.02  |
| At4g33030 | 0.46 | 1.95  |
| At2g14880 | 0.68 | 2.14  |
| At3g22890 | 0.61 | 1.62  |
| At1g13970 | 0.69 | 2.05  |
| At4g31430 | 0.54 | 1.72  |
| At1g64890 | 0.74 | 4.70  |
| At2g20600 | 0.61 | 3.49  |
| At1g31160 | 0.75 | 2.19  |
| At3g08660 | 0.71 | 1.51  |
| At5g61470 | 0.70 | 3.11  |
| At3g20230 | 0.71 | 10.39 |
| At1g33780 | 0.60 | 6.60  |
| At1g43840 | 0.77 | 4.65  |
| At1g13280 | 0.51 | 1.37  |
| At1g80830 | 0.53 | 2.48  |
| At3g30190 | 0.77 | 3.83  |
| At5g35100 | 0.74 | 1.56  |
| At2g36010 | 0.21 | 5.61  |
| At4g39550 | 0.77 | 7.80  |
| At1g29910 | 0.75 | 3.28  |
| At5g25930 | 0.72 | 3.68  |
| At2g24070 | 0.77 | 1.35  |
| At4g39050 | 0.68 | 2.05  |
| At4g21230 | 0.66 | 3.78  |
| At1g15070 | 0.68 | 11.93 |
| At1g19890 | 0.61 | 4.33  |
| At5g41960 | 0.60 | 1.65  |
| At4g19490 | 0.53 | 3.62  |
| At4g39000 | 0.36 | 2.47  |
| At5g23300 | 0.55 | 7.20  |
| At4g26010 | 0.67 | 9.51  |
| At1g54690 | 0.74 | 1.93  |
| At4g23100 | 0.75 | 2.33  |
| At4g01770 | 0.70 | 3.53  |
| At3g44990 | 0.67 | 4.75  |
| At4g25540 | 0.66 | 2.09  |
| At1g79760 | 0.68 | 3.86  |
| At4g18760 | 0.58 | 2.79  |
| At5g51770 | 0.33 | 2.42  |
| At4g29490 | 0.78 | 7.27  |
| At1g69240 | 0.51 | 1.57  |
| At5g19280 | 0.49 | 3.46  |

|           |      |       |
|-----------|------|-------|
| At3g17700 | 0.71 | 2.78  |
| At5g56660 | 0.76 | 1.61  |
| At1g04360 | 0.17 | 3.11  |
| At2g27770 | 0.76 | 2.23  |
| At1g80560 | 0.67 | 3.15  |
| At3g24810 | 0.28 | 4.01  |
| At5g27070 | 0.58 | 2.29  |
| At3g09850 | 0.51 | 4.45  |
| At4g23170 | 0.62 | 1.72  |
| At4g07560 | 0.72 | 1.81  |
| At3g62520 | 0.40 | 6.79  |
| At1g79250 | 0.77 | 1.67  |
| At2g21590 | 0.71 | 4.36  |
| At2g32400 | 0.55 | 4.64  |
| At2g36480 | 0.26 | 2.45  |
| At2g20090 | 0.57 | 3.00  |
| At5g55570 | 0.62 | 1.38  |
| At2g28755 | 0.75 | 2.78  |
| At5g64290 | 0.46 | 3.72  |
| At2g28790 | 0.65 | 2.72  |
| At3g60860 | 0.58 | 2.18  |
| At3g50140 | 0.46 | 1.54  |
| At3g54610 | 0.53 | 5.31  |
| At4g00610 | 0.77 | 2.01  |
| At2g36920 | 0.70 | 2.03  |
| At5g64580 | 0.57 | 1.62  |
| At1g62110 | 0.75 | 3.40  |
| At2g38810 | 0.64 | 4.59  |
| At1g51780 | 0.69 | 2.67  |
| At5g17840 | 0.78 | 2.56  |
| At4g39710 | 0.69 | 1.63  |
| At2g44500 | 0.48 | 7.04  |
| At5g10330 | 0.71 | 3.46  |
| At1g67770 | 0.37 | 2.04  |
| At3g51820 | 0.76 | 3.07  |
| At1g76240 | 0.64 | 2.94  |
| At5g07770 | 0.73 | 1.82  |
| At3g28460 | 0.60 | 1.73  |
| At2g24210 | 0.74 | 2.16  |
| At4g35690 | 0.72 | 3.48  |
| At2g38070 | 0.77 | 4.82  |
| At4g03800 | 0.67 | 2.43  |
| At1g72010 | 0.64 | 2.37  |
| At4g13270 | 0.45 | 1.58  |
| At1g13460 | 0.68 | 4.06  |
| At1g56020 | 0.61 | 1.41  |
| At1g55440 | 0.53 | 4.31  |
| At1g30920 | 0.65 | 2.49  |
| At5g60050 | 0.48 | 2.14  |
| At4g24090 | 0.71 | 1.52  |
| At4g15410 | 0.74 | 14.41 |
| At4g19390 | 0.75 | 1.42  |
| At1g79110 | 0.55 | 1.82  |
| At5g65350 | 0.71 | 1.59  |
| At2g34700 | 0.50 | 3.52  |
| At4g37130 | 0.69 | 3.77  |

|           |      |       |
|-----------|------|-------|
| At4g12000 | 0.38 | 10.37 |
| At1g68730 | 0.76 | 3.56  |
| At4g14380 | 0.65 | 1.51  |
| At2g04540 | 0.66 | 1.83  |
| At4g36910 | 0.57 | 3.26  |
| At4g36580 | 0.64 | 2.01  |
| At1g05030 | 0.64 | 2.53  |
| At2g14120 | 0.64 | 2.64  |
| At5g40470 | 0.42 | 6.66  |
| At2g40400 | 0.40 | 3.60  |
| At4g32260 | 0.71 | 3.46  |
| At1g16160 | 0.67 | 3.62  |
| At5g38290 | 0.59 | 10.58 |
| At3g47200 | 0.72 | 3.98  |
| At1g31790 | 0.76 | 2.58  |
| At4g35450 | 0.54 | 1.41  |
| At3g04680 | 0.75 | 5.27  |
| At3g50190 | 0.48 | 1.58  |
| At3g20920 | 0.67 | 6.48  |
| At1g73470 | 0.38 | 3.59  |
| At1g70170 | 0.49 | 1.49  |
